# Supplementary material for: Oxidative Chemical Stressors Alter the Physiological State of the Nasal Olfactory Mucosa of Atlantic Salmon
Source: MDPI journal article supplement (doi:10.3390/antiox9111144), 2020-11-18
Supplement: s1 [file s1]

| Annotation            | Name                                           | Fold  |
|-----------------------|------------------------------------------------|-------|
| Cytoskeleton          | Keratin 14                                     | 1.83  |
| Cytoskeleton          | Keratin 4                                      | 2.05  |
| Cytoskeleton          | Keratin cytoskeletal 17                        | 3.48  |
| Cytoskeleton          | Pleckstrin 2                                   | 2.11  |
| DNA replication       | DNA replication licensing factor MCM6          | 1.75  |
| Protein folding       | 14-3-3 protein alpha                           | 1.82  |
| Protein folding       | Heat shock cognate 70                          | 4.56  |
| Protein folding       | Heat shock cognate 70                          | 2.70  |
| Protein folding       | Heat shock protein 90, alpha                   | 5.02  |
| Protein folding       | Heat shock protein 90, alpha                   | 2.04  |
| Signaling             | Guanine nucleotide binding protein             | 2.06  |
| Redox homeostasis     | Glutathione reductase, mitochondrial           | 2.26  |
| Redox homeostasis     | Redox-regulatory protein FAM213A               | -2.67 |
| Signaling             | Tyrosine phosphatase type IVA, member 1        | 1.96  |
| Signaling             | Tyrosine phosphatase type IVA, member 1        | 1.98  |
| Cell Surface          | Vacuole membrane protein 1                     | 2.12  |
| B cell                | IgH-locus                                      | 1.90  |
| Cytokine receptor     | Interferon-alpha/beta receptor alpha chain     | 1.93  |
| Cytokine receptor     | Interleukin 13 receptor alpha-2                | 1.96  |
| Cytokine receptor     | Interleukin-1 receptor type II                 | 2.36  |
| Cytokine receptor     | Interleukin-1 receptor type II                 | 2.38  |
| Effector              | Differentially regulated trout protein 1       | 2.85  |
| Effector              | Ornithine decarboxylase                        | 1.97  |
| Effector              | Ornithine decarboxylase                        | 2.25  |
| Effector              | Ornithine decarboxylase                        | 2.62  |
| Effector              | Thrombin-like enzyme cerastocytin              | 2.85  |
| Lymphocyte            | T-lymphocyte maturation associated protein     | 2.72  |
| T cell                | CD276 antigen-like                             | 2.66  |
| TNF                   | TNF decoy receptor                             | 1.90  |
| Effector              | Spermidine/spermine N1-acetyltransferase       | 4.07  |
| Amino acid metabolism | Methionine adenosyltransferase II, alpha chain | 1.97  |
| Calcium metabolism    | Protein S100-A1                                | 2.22  |
| Iron metabolism       | Ferritin, heavy polypeptide 1b                 | 2.30  |
| Iron metabolism       | Ferritin, heavy polypeptide 1b                 | 2.36  |
| Iron metabolism       | Ferritin, heavy polypeptide 1b                 | 2.48  |
| Iron metabolism       | Ferritin, heavy polypeptide 1b                 | 2.20  |
| Iron metabolism       | Ferritin, heavy polypeptide 1b                 | 2.34  |
| Lipid metabolism      | Mid1-interacting protein 1-like                | -1.93 |
| Lipid metabolism      | Phospholipid transfer protein                  | -1.92 |
| Lipid metabolism      | Short-chain dehydrogenase/reductase 3          | -2.18 |
| Mitochondria          | Malic enzyme 3, NADP                           | -1.87 |
| Protease              | Calpain 9                                      | 2.22  |
| Protease              | Calpain 9                                      | 2.26  |
| Steroid metabolism    | Cholesterol 25-hydroxylase-like protein A      | 1.92  |
| Sugar metabolism      | Glycogen debranching enzyme                    | -1.90 |
| Xenobiotic metabolism | Glutathione S-transferase P-like               | 2.44  |
| Tissue ECM            | Fibronectin                                    | 1.74  |
| Collagen              | Collagen alpha-2(VI) chain                     | -3.01 |
| Mucus                 | GMP Giant mucus protein                        | 1.85  |
| Mucus                 | Mucin-5B                                       | 1.85  |
| Mucus                 | Mucin-5B                                       | 1.97  |
| Mucus                 | Arylalkylamine N-acetyltransferase             | -1.92 |
| Epithelium            | Epithelial membrane protein 2-like             | 1.75  |
| Secretory             | Gastrotropin-like                              | 2.83  |
| Lipid metabolism      | Globoside alpha-1,3-N-acetylgalactosaminide    | 2.62  |
| Unknown Uncertain     | uroplakin-3b-like protein                      | 2.01  |

|                   |                                       |       |
|-------------------|---------------------------------------|-------|
| Unknown Uncertain | sarcolemmal membrane-associated prote | -1.94 |
| Unknown Uncertain | Integral membrane protein 2A          | -1.77 |
| RNA metabolism    | Y box binding protein 1               | 1.73  |
| Hematopoiesis     | Transmembrane 4 L6 family member 1    | 4.06  |
| Neural            | Tetraspanin-3                         | 2.04  |
| Differentiation   | Secreted frizzled-related protein 1   | -1.79 |
