# Supplementary material for: Oxidative Chemical Stressors Alter the Physiological State of the Nasal Olfactory Mucosa of Atlantic Salmon
Source: MDPI journal article supplement (doi:10.3390/antiox9111144), 2020-11-18
Supplement: s1 [file s1]

## Supplementary File 1. Primers used in the present study.

| Gene name                               | Abbreviation    | Num.           | Sequence (5' – 3')                                    | Reference |
|-----------------------------------------|-----------------|----------------|-------------------------------------------------------|-----------|
| <i>Glutathione peroxidase</i>           | <i>gpx</i>      | BG934453       | F: GATTCGTTCCAAACTTCCTGCTA<br>R: GCTCCCAGAACAGCCTGTTG | [1]       |
| <i>Glutathione reductase</i>            | <i>gr</i>       | BG934480       | F: CCAGTGATGGCTTTTTTGAACCT<br>R: CCGGCCCCCACTATGAC    | [1]       |
| <i>Glutathione S-transferase</i>        | <i>gsta</i>     | NM_001141492   | F: AGGGCACAAGTCTAAAGAAGTC<br>R: GTCTCCGTGTTTGAAGCAG   | [2]       |
| <i>Manganese superoxide dismutase</i>   | <i>mnsod</i>    | DY718412       | F: GTTTCTCTCCAGCCTGCTCTAAG<br>R: CCGCTCTCCTTGTCGAAGC  | [1]       |
| <i>Copper/Zinc superoxide dismutase</i> | <i>cu/znsod</i> | BG936553       | F: CCACGTCCATGCCTTTGG<br>R: TCAGCTGCTGCAGTCACGTT      | [1]       |
| <i>Catalase</i>                         | <i>cat</i>      | BG935638       | F: GGGCAACTGGGACCTTAGT<br>R: GCATGGCGTCCCTGATAAA      | [3]       |
| <i>Interleukin 1β</i>                   | <i>il1b</i>     | AY617117       | F: AGGACAAGGACCTGCTCAACT<br>R: CCGACTCCAACCTCAACACTA  | [4]       |
| <i>Interleukin 10</i>                   | <i>il10</i>     | EF165029       | F: GGGTGTCACGCTATGGACAG<br>R: TGTTTCCGATGGAGTCGATG    | [4]       |
| <i>Interleukin 13 receptor 1 alpha</i>  | <i>il13ra</i>   | KY432362       | F: ACCAATCAGTCCCAGAAGA<br>R: GATGAACCGTTGAGAGTCCC     | [5]       |
| <i>Interferon c</i>                     | <i>ifnc</i>     | NM_001279097.1 | F: ATGTATGATGGGCAGTGTGG<br>R: CCAGGCGCAGTAACTGAAAT    | [6]       |
| <i>Heat shock protein 70</i>            | <i>hsp70</i>    | BG933934       | F: CCCCTGTCCTGGGTATTG<br>R: CACCAGGCTGGTGTCTGAGT      | [1]       |
| <i>Heat shock protein 90</i>            | <i>hsp90</i>    | contig03769    | F: CCACCATGGGCTACATGATG<br>R: CCTTCACCGCCTTGTCATTC    | [3]       |
| <i>Elongation factor alpha-1</i>        | <i>ef1a</i>     | BG933853       | F: GAATCGGCTATGCCTGGTGAC<br>R: GGATGATGACCTGAGCGGTG   | [7]       |
| <i>B-actin</i>                          | <i>actb</i>     | XM_014194537   | F: CCAAAGCCAACAGGGAGAA<br>R: AGGGACAACACTGCCTGGAT     | [8]       |
| <i>Acidic ribosomal protein</i>         | <i>arp</i>      | XM_014167939   | F: TCATCCAATTGCTGGATGACTATC<br>R: CTTCCACGCAAGGACAGA  | [8]       |

1. Solberg, M.F.; Kvamme, B.O.; Nilsen, F.; Glover, K.A. Effects of environmental stress on mRNA expression levels of seven genes related to oxidative stress and growth in Atlantic salmon *Salmo salar* L. of farmed, hybrid and wild origin. *BMC Res Notes* **2012**, *5*, 672–672, doi:10.1186/1756-0500-5-672.
2. Lazado, C.C.; Voldvik, V. Temporal control of responses to chemically induced oxidative stress in the gill mucosa of Atlantic salmon (*Salmo salar*). *Journal of Photochemistry and Photobiology B: Biology* **2020**, 111851.
3. Olsvik, P.A.; Vikeså, V.; Lie, K.K.; Hevrøy, E.M. Transcriptional responses to temperature and low oxygen stress in Atlantic salmon studied with next-generation sequencing technology. *BMC Genomics* **2013**, *14*, 817, doi:10.1186/1471-2164-14-817.
4. Ingerslev, H.-C.; Rønneseth, A.; Pettersen, E.F.; Wergeland, H.I. Differential Expression of Immune Genes in Atlantic Salmon (*Salmo salar* L.) Challenged Intraperitoneally or by Cohabitation with IPNV. *Scandinavian Journal of Immunology* **2009**, *69*, 90–98, doi:10.1111/j.1365-3083.2008.02201.x.
5. Sequeira, A.; Castillo, A.; Cordero, N.; Wong, V.; Montero, R.; Vergara, C.; Valenzuela, B.; Vargas, D.; Valdés, N.; Morales, J., et al. The Atlantic salmon interleukin 4/13 receptor family: Structure, tissue distribution and modulation of gene expression. *Fish & Shellfish Immunology* **2020**, *98*, 773–787, doi:<https://doi.org/10.1016/j.fsi.2019.11.030>.
6. Jenberie, S.; Thim, H.L.; Sunyer, J.O.; Skjædt, K.; Jensen, I.; Jørgensen, J.B. Profiling Atlantic salmon B cell populations: CpG-mediated TLR-ligation enhances IgM secretion and modulates immune gene expression. *Scientific Reports* **2018**, *8*, 3565, doi:10.1038/s41598-018-21895-9.
7. Garcia de la serrana, D.; Johnston, I.A. Expression of Heat Shock Protein (Hsp90) Paralogues Is Regulated by Amino Acids in Skeletal Muscle of Atlantic Salmon. *PLoS One* **2013**, *8*, e74295, doi:10.1371/journal.pone.0074295.
8. Sanden, M.; Olsvik, P.A. Intestinal cellular localization of PCNA protein and CYP1A mRNA in Atlantic salmon *Salmo salar* L. exposed to a model toxicant. *BMC Physiology* **2009**, *9*, 3, doi:10.1186/1472-6793-9-3.
